# Supplementary material
Source: publisher figshare collection journal article supplement (https://acs.figshare.com/ndownloader/files/12865880)
Supplement: Supplementary file 1 [file 12865880]

## Bringing Molecular Dynamics and Ion-Mobility Spectrometry Closer Together: Shape Correlations, Structure-Based Predictors and Dissociation

Alexander Kulesza<sup>a,b\*</sup>, Erik Marklund<sup>d</sup>, Luke MacAleese<sup>a,b</sup>, Fabien Chiro<sup>c</sup>, Philippe Dugourd<sup>a,b</sup>

---

*a. Université de Lyon, F-69622, Lyon, France.*

*b. CNRS et Université Lyon 1, UMR5306, Institut Lumière Matière*

*c. Univ Lyon, Université Claude Bernard Lyon 1, Ens de Lyon, CNRS, Institut des Sciences Analytiques UMR 5280, F-69100, Villeurbanne, France*

*d. Department of Chemistry – BMC, Uppsala University, Box 577, SE-751 23, Uppsala, Sweden*

\*E-mail: mail@alexanderkulesza.de

**Table S1:** Fitted parameters (eq. 1) for the CCS of all systems described in this paper (see Fig. 1 and 2 a-f) as a function of unfolding. The standard deviation  $\sigma^2$  comparing so-predicted dataset with the one of the explicitly calculated CCS<sub>EHS</sub> (see main text) are also given. Fitting parameters have been determined for  $r_{Gyr}$  in Å and CCS in Å<sup>2</sup>.

| System / Conditions | $a_0$    | $a_1$    | $a_2$  | $\sigma^2$ |
|---------------------|----------|----------|--------|------------|
| CAAKAAC 220K        | 246.942  | 325.154  | 4.131  | 14.5       |
| CAAKAAC 850K        | 290.981  | 321.518  | 4.862  | 12.4       |
| TrpCage 220K        | 395.938  | 143.176  | 5.960  | 9.6        |
| TrpCage 850K        | 302.594  | 280.999  | 4.670  | 15.2       |
| Abeta dimer 220K    | 958.746  | 126.447  | 9.301  | 25.9       |
| Abeta dimer 850K    | 960.845  | 170.043  | 9.295  | 87.0       |
| Ubiquitin 220K      | 837.639  | 538.287  | 9.220  | 25.1       |
| Ubiquitin 850K      | 442.112  | 962.518  | 7.198  | 59.9       |
| AntifreezeRD3 220K  | 1120.645 | 737.678  | 10.751 | 34.5       |
| AntifreezeRD3 850K  | 973.747  | 1044.422 | 10.465 | 64.1       |
| HdeA dimer 220K     | 1120.645 | 737.678  | 10.751 | 34.5       |
| HdeA dimer 850K     | 1782.895 | 652.480  | 13.712 | 128.1      |

**Table S2:** Fitted parameters (eq. 8) for the CCS of Ubiquitin as a function of unfolding. The standard deviation  $\sigma^2$  comparing so-predicted dataset with the one of the explicitly calculated CCS<sub>EHS</sub> (see main text) are also given. Fitting parameters have been determined for  $r_{Gyr}$  in Å and CCS in Å<sup>2</sup>.

| System / Conditions | $\Omega_{ref}$ | C         | $r_{ref}$ | $\sigma^2$ |
|---------------------|----------------|-----------|-----------|------------|
| Ubiquitin 220K      | 1828.665       | 10124.917 | 137.876   | 31.7       |

**Table S3:** Fitted parameters for the dissociation-covering approach (eq. 14-16) to describe the CCS unfolding (utilizing eq. 1 for full system and fragments). Data is given for of the Aβ dimer, the HdeA dimer and the antifreeze protein RD3 (cf Fig. 1 and 2 c,f,e). The standard deviation comparing so-predicted dataset with the one of the explicitly calculated CCS<sub>EHS</sub> (see main text) are also given. Fitting parameters have been determined for  $r_{Gyr}$  in Å and IA as well as CCS in Å<sup>2</sup>.

|                     | $a_0$        | $a_1$   | $a_2$  | $a_{0f}$ | $a_{1f}$ | $a_{2f}$ | b     | $l_0$   | $\sigma^2$ |
|---------------------|--------------|---------|--------|----------|----------|----------|-------|---------|------------|
| Aβ dimer 850K       | 732.733      | 435.200 | 8.414  | 96.820   | 573.841  | 2.975    | 0.399 | 3.924   | 23.3       |
| HdeA dimer 850K     | 1465.84<br>8 | 724.455 | 12.918 | 978.388  | 686.444  | 10.844   | 0.066 | 10.585  | 43.3       |
| Antifreeze RD3 220K | 1120.64<br>5 | 737.678 | 10.751 | 640.442  | 130.286  | 9.145    | 0.497 | -52.420 | 34.5       |

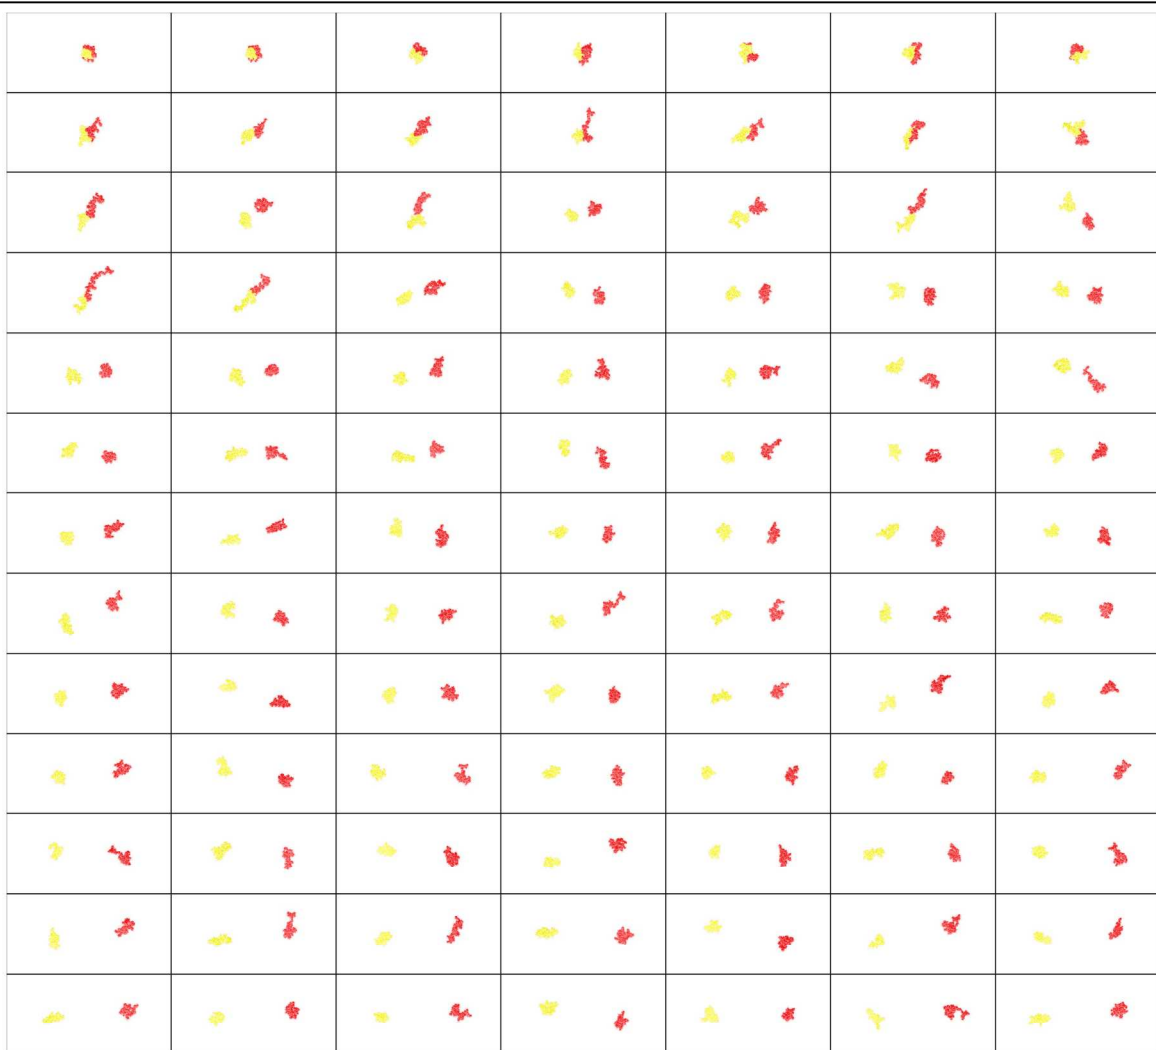

**Figure S1:** Snapshots of the 220 K PT-WTMetaD trajectory for the A $\beta$  dimer (cf Fig. 1c), sorted with increasing value of system's radius of gyration  $r_{Gyr}$ . Red and yellow denote the different monomers of the dimeric system.

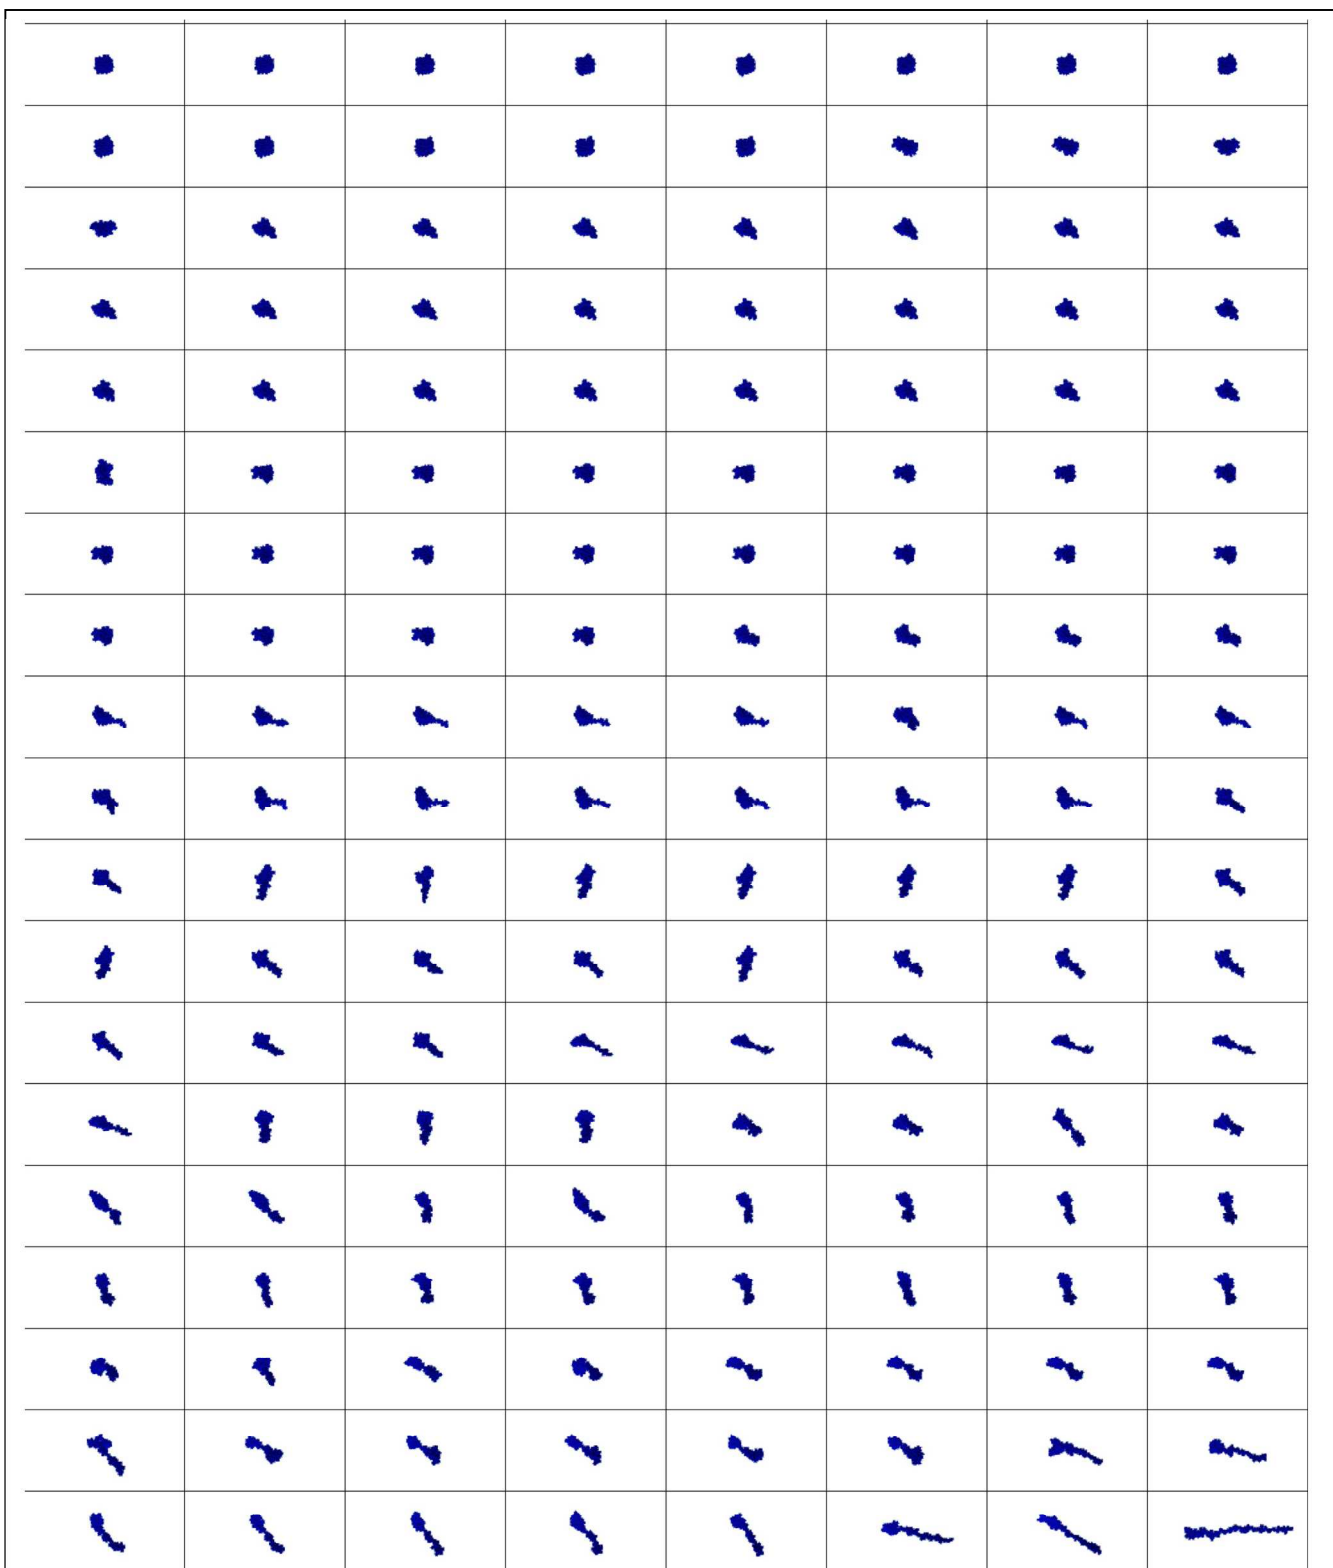

**Figure S2:** Snapshots of the 220 K PT-WTMetaD trajectory for Ubiquitin (cf Fig. 1d), sorted with increasing value of system's radius of gyration  $r_{gyr}$ .

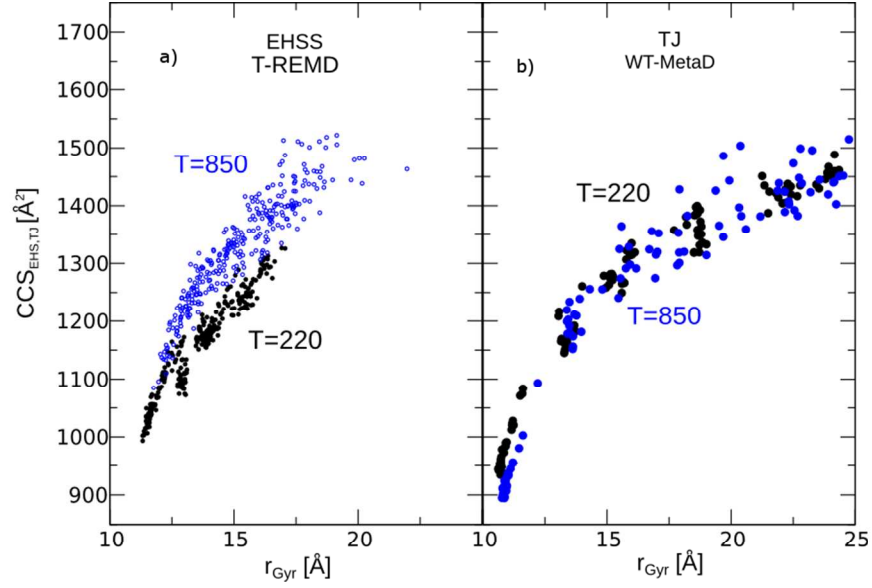

**Figure S3:** Correlations between explicitly calculated collisional cross-sections (CCS) and radii of gyration ( $r_{\text{Gyr}}$ ) for Ubiquitin (compare Figure 1 and 2 c). In a) the EHSS algorithm has been used for configurations sampled with T-REMD. In b) the TJ method for calculating CCS has been employed for configurations obtained along PT-WTMetaD. Blue and black denote different generation conditions (thermostat temperature).

Eq. 7 can be further simplified:

$$\Omega_{\text{SMS}} = \pi r_{\text{HS}}^2 + \pi r_{\text{HS}}^3 \left[ \frac{1}{r_{\text{HS}}} - \frac{1}{r} \right] = \pi r_{\text{HS}}^2 \left( 1 + r_{\text{HS}} \left[ \frac{1}{r_{\text{HS}}} - \frac{1}{r} \right] \right) = \pi r_{\text{HS}}^2 \left( 2 - \frac{r_{\text{HS}}}{r} \right) \quad (\text{eq. S1})$$

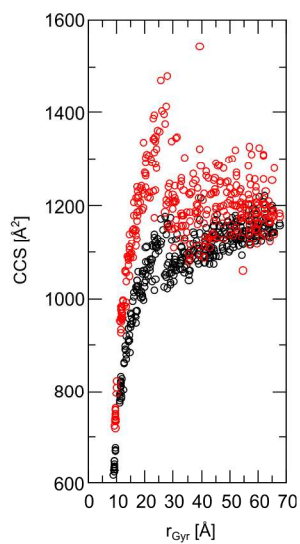

**Figure S4:** Correlations between explicitly calculated collisional cross-sections ( $CCS_{EHS}$ ) and radii of gyration ( $r_{Gyr}$ ) for the Amyloid- $\beta$  dimer (compare Figure 1 and 2 c given in red. In blue,  $\Omega$  from the dissociation-capable approach of eq. 14-15 is given, utilizing the predictors of eq. 11 for the full system and its fragments.

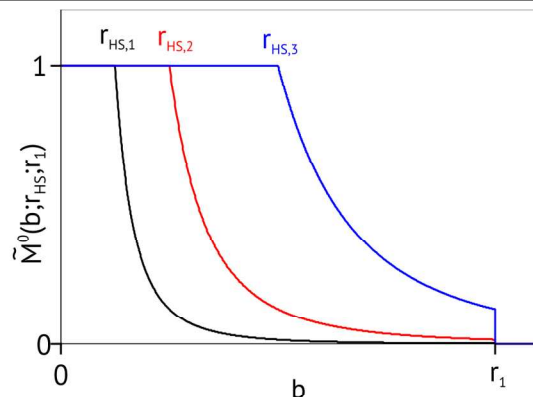

**Figure S5:** Plot of the approximated radius-dependent collision probability  $\tilde{M}^0(b; r_{HS}, r_1)$  along the scanned impact parameter  $b$ . The curves correspond to three different proteins/folding state combinations represented by three different radii describing the limit where the hard-spheres picture is applicable  $r_{HS}$  whereas the outer radius enclosing all atoms  $r_1$  is the same for the three systems. Here the black line corresponds to a “small” protein that is highly unfolded, while the blue line represents a much “bigger” protein that is much less unfolded. Notice that these systems would have the same cross-section if the hard-sphere-only picture had been applied ( $\Omega = \pi r_1^2$ ).
